# Supplementary material
Source: PubMed Central journal article supplement (PMC7906643)
Supplement: mmc3.pdf [file mmc3.pdf]

# THE LANCET

## Supplementary appendix

This appendix formed part of the original submission and has been peer reviewed.  
We post it as supplied by the authors.

Supplement to: Wouters OJ, Kenneth C Shadlen, Maximilian Salcher-Konrad, et al.  
Challenges in ensuring global access to COVID-19 vaccines: production, affordability,  
allocation, and deployment. *Lancet* 2021; published online Feb 12. [http://dx.doi.org/10.1016/S0140-6736\(21\)00306-8](http://dx.doi.org/10.1016/S0140-6736(21)00306-8).

## APPENDIX 3

### Methods for 32-country survey of COVID-19 vaccine acceptance

The raw data are available from the authors upon request.

#### Description of survey

This 32-country survey (n=26,758) of potential acceptance of COVID-19 vaccines was conducted between October 21, 2020, and December 16, 2020 (see Table A1 for field dates in each country). The data were jointly collected by the polling company ORB International—a member of the Worldwide Independent Network / Gallup International Association (WIN/GIA)—and the Vaccine Confidence Project (London School of Hygiene & Tropical Medicine) through telephone, online, and face-to-face interviewing, depending on the country; participants were recruited and verified locally. ORB International teamed up with polling companies in each country to collect the data. All companies followed industry ethics guidelines for data collection. Orb International had agreements in place in each country.

Within each country, the sample ranged from 500 respondents (e.g., Lebanon) to 1,500 respondents (e.g., South Korea). Samples were random and nationally representative of the adult population in 30 of the 32 countries. In Ecuador and Vietnam, interviews were only administered in the main cities (Quito and Guayaquil, Ecuador; Hanoi and Ho Chi Minh City, Vietnam). The agencies did not collect any personally identifiable data. Survey weights were applied to compensate for over- or under-sampling by sex, age, and sub-national region.

#### Questionnaire

Each respondent was asked, in a local language: “When a vaccine for the coronavirus becomes available, will you get vaccinated?” The companies that conducted the surveys in each country (Table A1) translated the question into local languages. The possible responses were “definitely will”, “unsure but probably will”, “unsure but probably will not”, or “definitely will not”. In Figure 3 (in the main text), the category “will not get vaccinated” included respondents who said they “definitely will not” or “probably will not” get vaccinated; the category “will get vaccinated” included respondents who said they “definitely will” or “probably will” get vaccinated.

When a vaccine for the coronavirus will become available, will you get vaccinated?

1. Definitely will get vaccinated
2. Unsure but probably will get vaccinated
3. Unsure but probably won't get vaccinated
4. Definitely won't get vaccinated

**Table A1.** Information about the surveys conducted in each country.

|           | <b>Country</b>             | <b>Company name</b>                        | <b>Survey method</b> | <b>Sample</b> | <b>Coverage</b>     | <b>Margin of error, %<sup>a</sup></b> | <b>2020 field dates</b> |
|-----------|----------------------------|--------------------------------------------|----------------------|---------------|---------------------|---------------------------------------|-------------------------|
| <b>1</b>  | <b>ARGENTINA</b>           | Voices!                                    | CAWI / ONLINE        | 1016          | Nationwide          | 3.1                                   | Nov. 5-19               |
| <b>2</b>  | <b>BRAZIL</b>              | Market Analysis Brasil                     | CAWI / ONLINE        | 1120          | Nationwide          | 2.9                                   | Nov. 13-20              |
| <b>3</b>  | <b>CANADA</b>              | Legér 360                                  | CAWI / ONLINE        | 1000          | Nationwide          | 3.1                                   | Nov. 4-14               |
| <b>4</b>  | <b>CHILE</b>               | ACTIVIA RESEARCH                           | CAWI / ONLINE        | 1000          | Nationwide          | 3.1                                   | Nov. 6-11               |
| <b>5</b>  | <b>CHINA</b>               | WisdomAsia Marketing & Research Consulting | CAWI / ONLINE        | 1000          | Nationwide          | 3.1                                   | Nov. 10-16              |
| <b>6</b>  | <b>CROATIA</b>             | MEDIANA FIDES                              | CAWI / ONLINE        | 520           | Nationwide          | 4.3                                   | Nov. 11-12              |
| <b>7</b>  | <b>DENMARK</b>             | DMA Research A/S                           | CAWI / ONLINE        | 500           | Nationwide          | 4.4                                   | Nov. 1-15               |
| <b>8</b>  | <b>ECUADOR</b>             | CEDATOS                                    | CATI                 | 700           | Quito and Guayaquil | 3.7                                   | Nov. 1-15               |
| <b>9</b>  | <b>FINLAND</b>             | TALOUSTUTKIMUS Oy                          | CAWI / ONLINE        | 651           | Nationwide          | 3.8                                   | Nov. 18-20              |
| <b>10</b> | <b>FRANCE</b>              | BVA                                        | CAWI / ONLINE        | 1000          | Nationwide          | 3.1                                   | Dec.8-12                |
| <b>11</b> | <b>GERMANY</b>             | Produkt + Markt                            | CAWI / ONLINE        | 1000          | Nationwide          | 3.1                                   | Oct. 21-28              |
| <b>12</b> | <b>HONG KONG</b>           | CSG                                        | CAWI / ONLINE        | 509           | Nationwide          | 4.3                                   | Nov. 18-23              |
| <b>13</b> | <b>INDIA</b>               | DataPrompt International Pvt. Ltd.         | CAWI / ONLINE        | 500           | Nationwide          | 4.4                                   | Nov. 30 - Dec. 4        |
| <b>14</b> | <b>INDONESIA</b>           | DEKA Insight Indonesia                     | CAWI / ONLINE        | 1000          | Nationwide          | 3.1                                   | Nov. 14-25              |
| <b>15</b> | <b>Republic of IRELAND</b> | REDC                                       | CAWI / ONLINE        | 1001          | Nationwide          | 3.1                                   | Nov. 5-10               |
| <b>16</b> | <b>ITALY</b>               | BVA Doxa                                   | CAWI / ONLINE        | 1000          | Nationwide          | 3.1                                   | Oct. 26-29              |

|    |                          |                              |               |      |                            |     |                   |
|----|--------------------------|------------------------------|---------------|------|----------------------------|-----|-------------------|
| 17 | <b>JAPAN</b>             | NIPPON RESEARCH CENTER, LTD. | CAWI / ONLINE | 1137 | Nationwide                 | 2.9 | Nov. 6-9          |
| 18 | <b>LEBANON</b>           | REACH SAL                    | CATI          | 500  | Nationwide                 | 4.4 | Nov. 5-19         |
| 19 | <b>MALAYSIA</b>          | Compass Insights Sdn. Bhd.   | CAWI / ONLINE | 500  | Nationwide                 | 4.4 | Nov. 1-16         |
| 20 | <b>MEXICO</b>            | BRAIN RESEARCH               | CAWI / ONLINE | 500  | Nationwide                 | 4.4 | Nov. 13-23        |
| 21 | <b>NIGERIA</b>           | Market Trends International  | F2F           | 1000 | Nationwide                 | 3.1 | Nov. 16-30        |
| 22 | <b>PAKISTAN</b>          | Gallup Pakistan              | CATI          | 1103 | Nationwide                 | 3.0 | Nov. 5-15         |
| 23 | <b>PARAGUAY</b>          | ICA Consultoria Estratègica  | CATI          | 500  | Nationwide                 | 4.4 | Dec. 2-15         |
| 24 | <b>PERU</b>              | Datum Internacional          | CAWI / ONLINE | 1210 | Nationwide                 | 2.8 | Nov. 2-5          |
| 25 | <b>POLAND</b>            | Mareco Polska                | CAWI / ONLINE | 587  | Nationwide                 | 4.0 | Oct. 28-31        |
| 26 | <b>Republic of KOREA</b> | Gallup Korea                 | F2F           | 1500 | Nationwide                 | 2.5 | Nov. 7-29         |
| 27 | <b>SERBIA</b>            | MEDIANA ADRIA                | CAWI / ONLINE | 500  | Nationwide                 | 4.4 | Nov. 12-16        |
| 28 | <b>SLOVENIA</b>          | MEDIANA                      | CAWI / ONLINE | 798  | Nationwide                 | 3.5 | Nov. 11-12        |
| 29 | <b>SPAIN</b>             | Istituto DYM                 | CAWI / ONLINE | 1006 | Nationwide                 | 3.1 | Oct. 22-23        |
| 30 | <b>UK</b>                | ORB INTERNATIONAL            | CAWI / ONLINE | 1000 | Nationwide                 | 3.1 | Dec. 11-13        |
| 31 | <b>USA</b>               | SSRS                         | CAWI / ONLINE | 800  | Nationwide                 | 3.5 | Nov. 11-18        |
| 32 | <b>VIETNAM</b>           | Indocina Research Vietnam    | F2F / TAPI    | 600  | Hanoi and Ho Chi Minh City | 4.0 | Oct. 31 - Nov. 12 |

CAWI=computer-assisted web interviewing. CATI=computer-assisted telephone interviewing. F2F=face-to-face (interviewing). TAPI=tablet-assisted personal interviewing. UK=United Kingdom. USA=United States of America. <sup>a</sup> This is the margin of error at the 95% confidence level; these surveys were conducted using simple random sampling.
